# Supplementary material for: Gene-expression analysis of a colorectal cancer-specific discriminatory transcript set on formalin-fixed, paraffin-embedded (FFPE) tissue samples
Source: Springer Nature journal article supplement (doi:10.1186/s13000-015-0363-4), 2015-07-24
Supplement: MOESM1 [file 9771960]

| Gene symbol    | Gene name                               | Number of successful / failed RT-PCR reactions |             |                |             |
|----------------|-----------------------------------------|------------------------------------------------|-------------|----------------|-------------|
|                |                                         | Fresh frozen samples                           |             | FFPE samples   |             |
|                |                                         | Normal samples                                 | CRC samples | Normal samples | CRC samples |
| <b>CA7</b>     | carbonic anhydrase VII                  | 15/0                                           | 15/0        | 15/0           | 7/8         |
| <b>CHI3L1</b>  | chitinase 3-like 1                      | 15/0                                           | 15/0        | 15/0           | 15/0        |
| <b>COL12A1</b> | collagen, type XII, alpha 1             | 15/0                                           | 15/0        | 15/0           | 15/0        |
| <b>CXCL1</b>   | chemokine (C-C-C motif) ligand 1        | 15/0                                           | 15/0        | 14/1           | 15/0        |
| <b>CXCL2</b>   | chemokine (C-C-C motif) ligand 2        | 15/0                                           | 15/0        | 15/0           | 15/0        |
| <b>GREM1</b>   | gremlin 1                               | 15/0                                           | 15/0        | 15/0           | 15/0        |
| <b>IL1B</b>    | interleukin 1, beta                     | 15/0                                           | 15/0        | 15/0           | 15/0        |
| <b>IL1RN</b>   | interleukin 1 receptor antagonist       | 15/0                                           | 15/0        | 15/0           | 15/0        |
| <b>IL8</b>     | interleukin 8                           | 15/0                                           | 15/0        | 13/2           | 15/0        |
| <b>MMP3</b>    | matrix metalloproteinase 3              | 15/0                                           | 15/0        | 9/6            | 15/0        |
| <b>SLC7A5</b>  | solute carrier family 7, member 5       | 15/0                                           | 15/0        | 15/0           | 15/0        |
| <b>RN18S1</b>  | RNA, 18S ribosomal 1, 18S ribosomal RNA | 15/0                                           | 15/0        | 15/0           | 15/0        |
